# Supplementary material
Source: Springer Nature journal article supplement (https://www.springermedizin.de/resource/supplementary/12958_2007_405_MOESM5_ESM.pdf/9567812)

**pg TNF  $\alpha$  /  $\mu$ g protein**

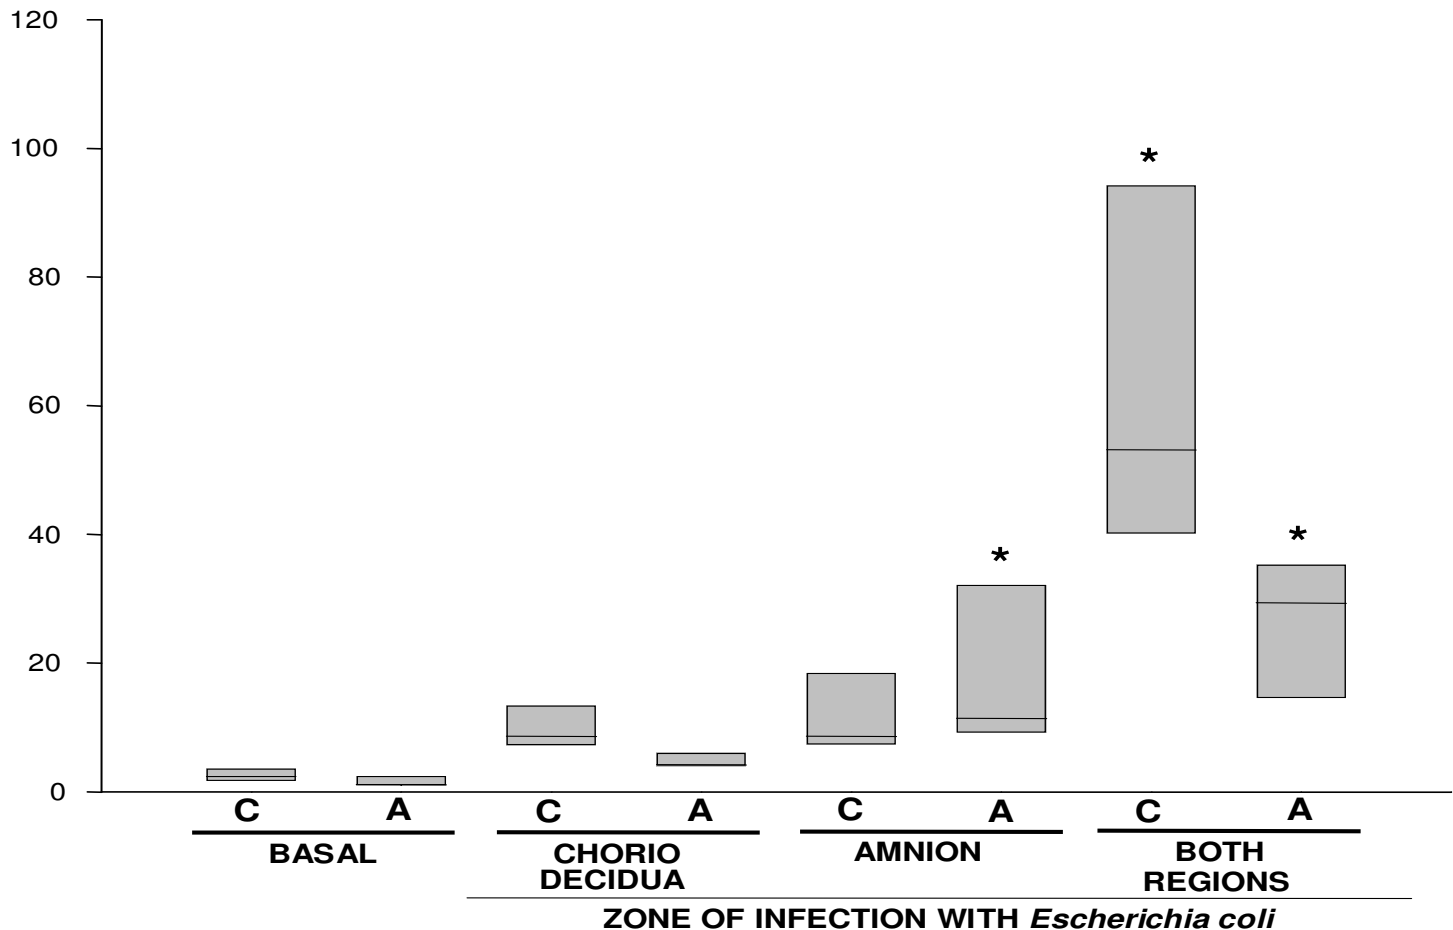

Supplement: MOESM5 [file 9567812]
